# Supplementary material for: Maternal exposure to polycyclic aromatic hydrocarbons diminishes murine ovarian reserve via induction of Harakiri
Source: JCI journal article supplement (doi:10.1172/jci28493), 2007-11-21
Supplement: sd1 [file 1]

Supplementary Fig. 1

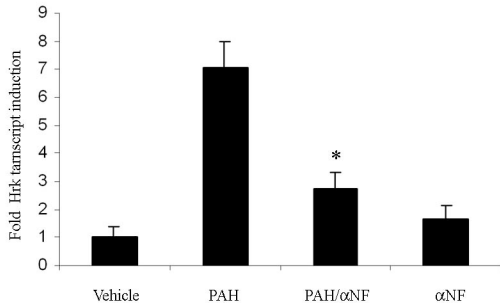

### Supplementary Figure 1.

Induction of Hrk transcript in in vitro treated neonatal ovaries 24 hours after exposure to vehicle, 1 $\mu$ M DMBA/BaP each (PAH), co-treatment with 2 $\mu$ M  $\alpha$ -NF (PAH/ $\alpha$ -NF) or 2 $\mu$ M  $\alpha$ -NF alone. The expression data are shown as mean  $\pm$  s.e.m of fold change in comparison to vehicle treated group and were obtained from 4 sets of independent ovaries per treatment. PAH induced significant (p=0.0006) upregulation of Hrk transcript, which was repressed by  $\alpha$ -NF treatment (p<0.01).

### Supplementary Table 1

Table 1: Oligonucleotide Primers Used for Site-Directed Mutagenesis

| XRE site         | Primer | Sequence (5'→3')                     |
|------------------|--------|--------------------------------------|
| HRK-XRE1 (-2036) | XRE1F  | tttatttgagcccgatgaatgccaggcgcttggcac |
|                  | XRE1R  | gtgccaagcgcttgccattcatcgggctcaaataaa |
| HRK-XRE2 (-1297) | XRE2F  | agtgttgggattaaaggaatgtacaaccactgctcg |
|                  | XRE2R  | cgagcagtgggtgtacattcctttaatccaacact  |
| HRK-XRE3 (-489)  | XRE3F  | cagaaggggtgcaacgaatgtcaggaatgtgtgca  |
|                  | XRE3R  | tgcacacattcctgacattcgttgacccccctctg  |
